# Supplementary material for: Leptospirosis in humans and selected animals in Sub-Saharan Africa, 2014–2022: a systematic review and meta-analysis
Source: BMC Infect Dis. 2023 Oct 3;23:649. doi: 10.1186/s12879-023-08574-5 (PMC10546638; doi:10.1186/s12879-023-08574-5)
Supplement: Supplementary file 1 — Additional file 1. [file 12879_2023_8574_MOESM1_ESM.xlsx]

## Sheet: Human_data used for analysis
Setting	Author	study design	sample_size	country	region	sex	age	diagnositc criteria	collection months	study period	case definiton	positive samples
urban_rural	Ntabanganyimana 2021	cross-sectional	377	Rwanda	EA		>21 yrs	ELISA	2016-01-01	2016	ELISA IgG OD > 1.0, 2) ELISA IgM OD > 1.0	119
urban_rural	Ntabanganyimana 2021	cross-sectional	377	Rwanda	EA		>21 yrs	MAT	2016-01-01	2016	≥ 1:100.	136
urban	Mirambo 2018	cross-sectional	250	Tanzania	EA	M(249/250)	median 31(25-38)yrs	MAT	May to july 2017	2017	≥ 1: 80	26
rural	Ribeiro 2017	cross-sectional	373	Mozambique	EA	M(171/373)	26 (14-40)	ELISA	July 2012 and sept 2015	2012-2015	presence of an acute febrile illness and positive results for IgM ELISA and/or a MAT antibody titer of <400	38
rural	Ribeiro 2017	cross-sectional	373	Mozambique	EA	M(171/373)	26 (14-40)	MAT	July 2012 and sept 2015	2012-2015	≥1:400	5
rural	Nimo-Paintsil 2019	cross-sectional	657	Ghana	WA	M(297)F(356)	18-98, mean 41.4(18.3)	ELISA				140
urban_rural	Cook 2016	cross-sectional	737	Kenya	EA	M (97%)	18-82y mean:39(39-40)	ELISA	may 2011 to october 2012	2011-2012		99
urban_rural	Maze 2018	cross-sectional	1293	Tanzania	EA	acute(F:13/24), sero (F:147/252)	33.5 (0.3-93.5)	MAT	february 2012 to may 2014	2012-2014	≥1:100	252
rural	Simpson 2018	cross-sectional	138	South Africa	SA	febrilers (F:46/74), dip-tankster (46/64)	25-68	ELISA	october 2012 to june 2013	2012-2013		19
rural	Chilongola 2020	cross-sectional	128	Tanzania	EA	F(43/128)	<5 (21), 5-15 (24, >15 (83)	PCR	april to may 2016	2016	A positive result was assigned if the threshold cycle (Ct) value was ≤30 cycles for all pathogens	3
urban	Wambi 2022	cross-sectional	254	Uganda	EA		5-87	MAT	july and oct 2018	2018	≥ 1:100.	12
urban_rural	Chipwaza 2015	cross-sectional	370	Tanzania	EA	M(189/370)	2-13 yrs, <5 (205/370), >5(165/370)	ELISA			Presumptive acute - a positive IgM antibodies	59
urban_rural	Chipwaza 2015	cross-sectional	200	Tanzania	EA	M(189/370)	2-13 yrs, <5 (205/370), >5(165/370)	MAT			≥ 1:160	26
rural	Assenga 2015	cross-sectional	267	Tanzania	EA			MAT	sept 2012 and april 2013	2012-2013		80
urban_rural	Yi 2019	cross-sectional	100	Sierra Leone	WA	M 59 F(41	0-75yrs	PCR	july 2016 and june 2017	2016-2017		4
urban_rural	Allan 2020	cross-sectional	1225	Tanzania	EA			MAT	Sept 2007 to Aug 2008 and Feb 2012 to May 2014	2007-2014	≥ 4-fold rise in titres or ≥1: 800	109
rural	Roqueplo 2019	cross-sectional	545	Senegal	WA			MAT	2014 and 2012	2012-2014	≥1:100	42
urban_rural	Samir 2015	cross-sectional	175	Egypt	NA			MAT				87
urban_rural	Samir 2015	cross-sectional	175	Egypt	NA			PCR				0
rural	Mgode 2019	cross-sectional	455	Tanzania	EA	M(307), F(148)	>=18	MAT				72
urban_rural	Zida 2018	cross-sectional	781	Burkina Faso	WA	M(61%)	20 (12-30)	ELISA	jan 2014 to jul 2015	2014-2015		45
urban_rural	Zida 2018	cross-sectional	781	Burkina Faso	WA	M(61%)	20 (12-30)	MAT	jan 2014 to jul 2015	2014-2015	≥1:400	23
urban_rural	Zida 2018	cross-sectional	781	Burkina Faso	WA	M(61%)	20 (12-30)	PCR	jan 2014 to jul 2015	2014-2015		4
rural	Hegazy 2021	cross-sectional	129	Egypt	NA			ELISA				8
urban_rural	Kakoni 2021	retrospective cross-sectional	1300	DRC	CA			ELISA	jan 2017 to dec 2018	2017-2018		88
rural	Dreyfus 2016	cross-sectional	359	Uganda	EA	M(96/359)	>=18	MAT	march and april 2014	2014	≥ 1:100	126
rural	Hercik 2018	cross-sectional	191	Tanzania	EA	M(66%)	23 (range 1-80)	syndromic TaqMan array card (TAC)	june to jul 2014	2014-2014		3
rural	Hercik 2017	cross-sectional	842	Tanzania	EA	M(66%0	23 (1-79)	syndromic TaqMan array card (TAC)	sept 2014 to sept 2015	2014-2015		22
urban_rural	Abdelrahim 2021	cross-sectional	153	Sudan	NA	M(99/153)	1.5 (0.07, 15)	PCR	Jan to may 2010	2010-2010		9
rural	Medkour 2021	cross-sectional	38	DRC	CA			PCR	2017 and 2019	2017-2019		31
rural	Bertherat 2014	cross sectional	54	DRC	CA			MAT	2004-12-01	2004	≥ 4-fold rise in titres or ≥1: 800	29
urban_rural	Rubbo 2018	retrospective cross-sectional	497	CAR	CA			ELISA	2012-2015	2012-2015		46
urban_rural	Rubbo 2018	retrospective cross-sectional	32	CAR	CA			MAT	2012-2015	2012-2015		7
urban	Msemwa 2021	cross sectional	205	Tanzania	EA		median=26(IQR 17-40)	MAT	may-july 2018	2018		33
urban_rural	Koffi 2018	cross sectional	384	Ivory Coast	WA			ELISA	2014	2018		90
urban_rural	Koffi 2018	cross sectional	384	Ivory Coast	WA			MAT	2014	2014		36
rural	Muller 2016	cross sectional	267	Tanzania	EA			MAT	august 2013 and november 2014	2013-2014	≥ 1:160	80
urban_rural	Gadia 2017	cross sectional	198	CAR	CA			ELISA	2008-2010	2008-2010		0
rural	Mgode 2021	cross sectional	50	Tanzania	EA			MAT	march to april 2016	2016		15

## Sheet: Cattle data used for analysis
Setting	Author	study design	sample_size	country	region	species	age	diagnositc criteria	collection months	study period	case definiton	positive samples
rural	Nthiwa 2019	cross-sectional	1170	Kenya	EA	Cows		ELISA	septerber 2016 to july 2017	2016-2017		275
rural	Atherstone 2014	cross-sectional	92	Uganda	EA	Cows		ELISA	2007 to 2011	2007-2011		27
rural	Lucchese 2016	cross-sectional	88	Morocco	NA	Cows		ELISA				8
rural	Dogonyaro 2020	cross-sectional	199	South Africa	SA	Cows		MAT	sept 2016 and April 2017	2016-2017		55
rural	Horton 2014	cross-sectional	161	Egypt	NA	Cows		MAT	July 2009	2009		64
rural	Benkirane 2014	cross-sectional	126	Morocco	NA	Cows		MAT	jan and april 2012	2012		19
rural	Assenga 2015	cross-sectional	1103	Tanzania	EA	Cows		MAT	sept 2012 and april 2013	2012-2013		335
rural	Rajeev 2017	cross-sectional	415	Kenya	EA	Cows		ELISA	june to july 2012	2012		148
rural	Roqueplo 2019	cross-sectional	56	Senegal	WE	Cows		MAT	2014 and 2012	2012-2014		17
urban_rural	Samir 2015	cross-sectional	625	Egypt	NA	Cows		MAT				235
urban_rural	Samir 2015	cross-sectional	625	Egypt	NA	Cows		PCR				7
rural	Hegazy 2021	cross-sectional	112	Egypt	NA	Cows		ELISA				4
rural	Allan 2018	cross-sectional	452	Tanzania	EA	Cows		PCR	May-June 2013 (wet season); 2) May-June 2014 (wet season); and 3) August-September 2014 (dry season)	2013-2014		32
urban_rural	Alinaitwe 2019	cross-sectional	500	Uganda	EA	Cows		PCR	june and july 2017	2017		65
urban_rural	Ajayi 2020	cross-sectional	20	Nigeria	WE	Cows		MAT				7
urban_rural	Ajayi 2020	cross-sectional	170	Nigeria	WE	Cows		Culture				130

## Sheet: Goat data used for analysis
Setting	Author	study design	sample_size	country	region	species	age	diagnositc criteria	collection months	study period	case definiton	positive samples
rural	Benkirane 2014	cross-sectional	30	Morocco	NA	goat		MAT	jan and april 2012	2012		6
rural	Assenga 2015	cross-sectional	248	Tanzania	EA	goat		MAT	sept 2012 and april 2013	2012-2013		21
rural	Roqueplo 2019	cross-sectional	52	Senegal	WA	goat		MAT	2014 and 2012	2012-2014		18
rural	Allan 2018	cross-sectional	162	Tanzania	EA	goat		PCR	May-June 2013 (wet season); 2) May-June 2014 (wet season); and 3) August-September 2014 (dry season)	2013-2014		2
rural	Mgode 2021	cross-sectional	45	Tanzania	EA	goat		MAT	march to april 2016	2016		28

## Sheet: Rodent_data used for analysis
Setting	Author	study design	sample_size	country	region	species	age	diagnositc criteria	collection months	study period	case definiton	positive samples	ROB
rural	Mgode 2014	cross-sectional	89	Tanzania	EA	Rodent		MAT				23
rural	Assenga 2015	cross-sectional	207	Tanzania	EA	Rodent		MAT	sept 2012 and april 2013	2012-2013		42
urban	Houemenou 2019	cross-sectional	689	Benin	WA	Rodent		PCR	2009 and 2017	2009-2017		84
urban	Moseley 2020	cross-sectional	171	South Africa	SA	Rodent		PCR	jan to may 2016	2016		75
urban	Comia 2018	cross-sectional	57	Mozambique	EA	Rodent		PCR	2015	2015		2
urban_rural	Samir 2015	cross-sectional	270	Egypt	NA	Rodent		MAT				205
urban_rural	Samir 2015	cross-sectional	270	Egypt	NA	Rodent		PCR				65
rural	Mgode 2019	cross-sectional	24	Tanzania	EA	Rodent		MAT				4
rural	Allan 2018	cross-sectional	384	Tanzania	EA	Rodent		PCR	May-June 2013 (wet season); 2) May-June 2014 (wet season); and 3) August-September 2014 (dry season)	2013-2014		0
urban	Dossou 2022	cross-sectional	100	Benin	WA	Rodent		PCR	nov 2016 and june 2018	2016-2018		11
urban_rural	Fortes-Gabriel 2016	cross-sectional	37	Angola	CA	Rodent		Culture	feb 2013 and april 2013	2013		4
urban	Mangombi 2021	cross-sectional	198	Gabon	CA	Rodent		PCR	2014	2014		7
rural	Mgode 2021	cross-sectional	45	Tanzania	EA	Rodent		MAT	march to april 2016	2016		7
rural	Plata-Luis 2016	cross-sectional	62	Cape Verde	WA	Rodent		PCR	2012 to 2013	2012-2013		16

## Sheet: Risk of bias
ROB assessed usin tool developed by Hoy el al., 2012
Assessing risk of bias in prevalence studies: modification of an existing tool and evidence of interrater agreement. https://doi.org/10.1016/j.jclinepi.2011.11.014
African region	reference	item (0=Low risk: 1=high risk)										overall ROB
		External validity				Internal validity
ROB items		1	2	3	4	5	6	7	8	9	10	total	ROB
Central Africa	Kakoni 2021	1	1	1	0	0	0	0	0	0	0	3	low
	Medkour 2021	1	1	1	0	0	1	0	1	0	0	5	moderate
	Bertherat 2014	1	1	1	0	0	0	0	0	0	0	3	low
	Gadia 2017	1	1	0	0	0	1	0	1	0	0	4	moderate
	Rubbo 2018	1	1	1	0	0	0	0	1	0	0	4	moderate
East Africa	Ntabanganyimana 2021	0	0	1	0	0	0	0	0	0	0	1	low
	Mirambo 2018	0	0	1	0	0	0	0	0	0	0	1	low
	Cook 2016	0	0	1	0	0	0	0	0	0	0	1	low
	Chipwaza 2015	0	0	1	0	0	0	0	0	0	0	1	low
	Assenga 2015	0	0	0	0	0	0	0	0	0	0	0	low
	Allan 2020	1	0	1	0	0	0	0	0	0	0	2	low
	Mgode 2019	1	0	1	0	0	0	0	0	0	0	2	low
	Maze 2018	1	0	1	0	0	0	0	0	0	0	2	low
	Dreyfus 2016	1	0	0	0	0	0	0	0	0	0	1	low
	Hercik 2018	1	0	1	0	0	0	0	0	0	0	2	low
	Hercik 2017	1	0	1	0	0	0	0	0	0	0	2	low
	Msemwa 2021	1	0	0	0	0	0	0	0	0	0	1	low
	Muller 2016	1	1	0	0	0	0	0	0	0	0	2	low
	Mgode 2021	1	1	1	0	0	0	0	0	0	0	3	low
	Chilongola 2020	1	1	1	0	0	0	0	0	0	0	3	low
	Wambi 2022	1	1	1	0	0	0	0	0	0	0	3	low
	Ribeiro 2017	1	1	1	0	0	0	0	0	0	0	3	low
	Nthiwa 2019	1	0	1	0	0	0	0	0	0	0	2	low
	Rajeev 2017	1	1	1	0	0	0	0	0	0	0	3	low
	Allan 2018	1	0	1	0	0	0	0	0	0	0	2	low
	Alinaitwe 2019	1	0	0	0	0	0	0	0	0	0	1	low
	Atherstone 2014	1	1	1	0	0	0	0	0	0	0	3	low
	Mgode 2014	1	1	1	0	0	0	0	0	0	0	3	low
	Comia 2018	1	0	0	0	0	0	0	0	0	0	1	low
Southern Africa	Simpson 2018	1	1	1	0	0	0	0	0	0	0	3	low
	Dogonyaro 2020	1	0	0	0	0	0	0	0	0	0	1	low
West Africa	Nimo-Paintsil 2019	1	1	1	0	0	0	0	0	0	0	3	low
	Zhang 2019	1	1	1	0	0	0	0	0	0	0	3	low
	Roqueplo 2019	1	1	1	0	0	0	0	0	0	0	3	low
	Zida 2018	1	1	1	0	0	0	0	0	0	0	3	low
	Koffi 2018	1	0	0	0	0	0	0	0	0	0	1	low
	Ajayi 2020	1	1	1	0	0	0	0	0	0	0	3	low
											0
